# Supplementary material for: Optical and hygroscopic properties of black carbon influenced by particle microphysics at the top of anthropogenically polluted boundary layer
Source: Copernicus journal article supplement (doi:10.5194/acp-2020-762), 2020-08-17
Supplement: Supplementary file 1 [file acp-2020-762-supplement.pdf]

## Supplements

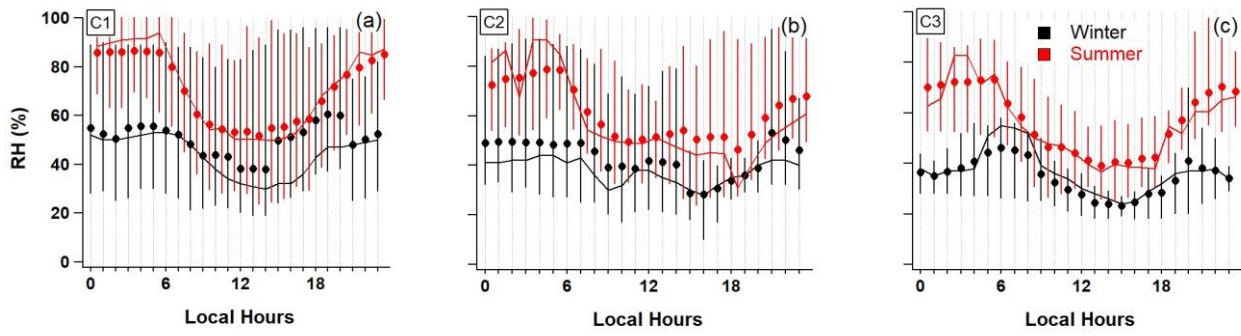

Fig. S1. Diurnal variations of RH for the three PBL types in both seasons. The solid circles, lines and whiskers denote the mean, median, 25<sup>th</sup>, 75<sup>th</sup> percentile respectively.

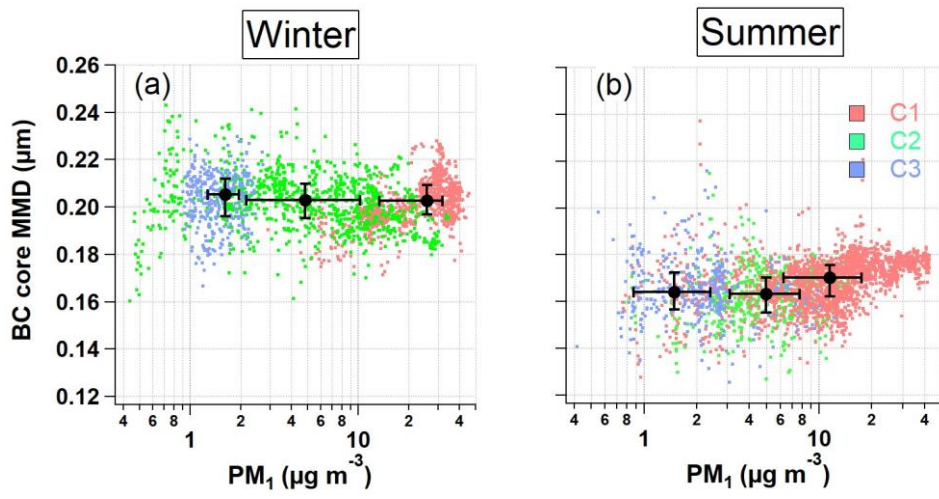

Fig. S2. BC core MMD as a function of  $\text{PM}_{10}$  in winter (a) and summer (b) for the three PBL types, with solid circles, whiskers denoting the median, 25<sup>th</sup>, 75<sup>th</sup> percentiles.

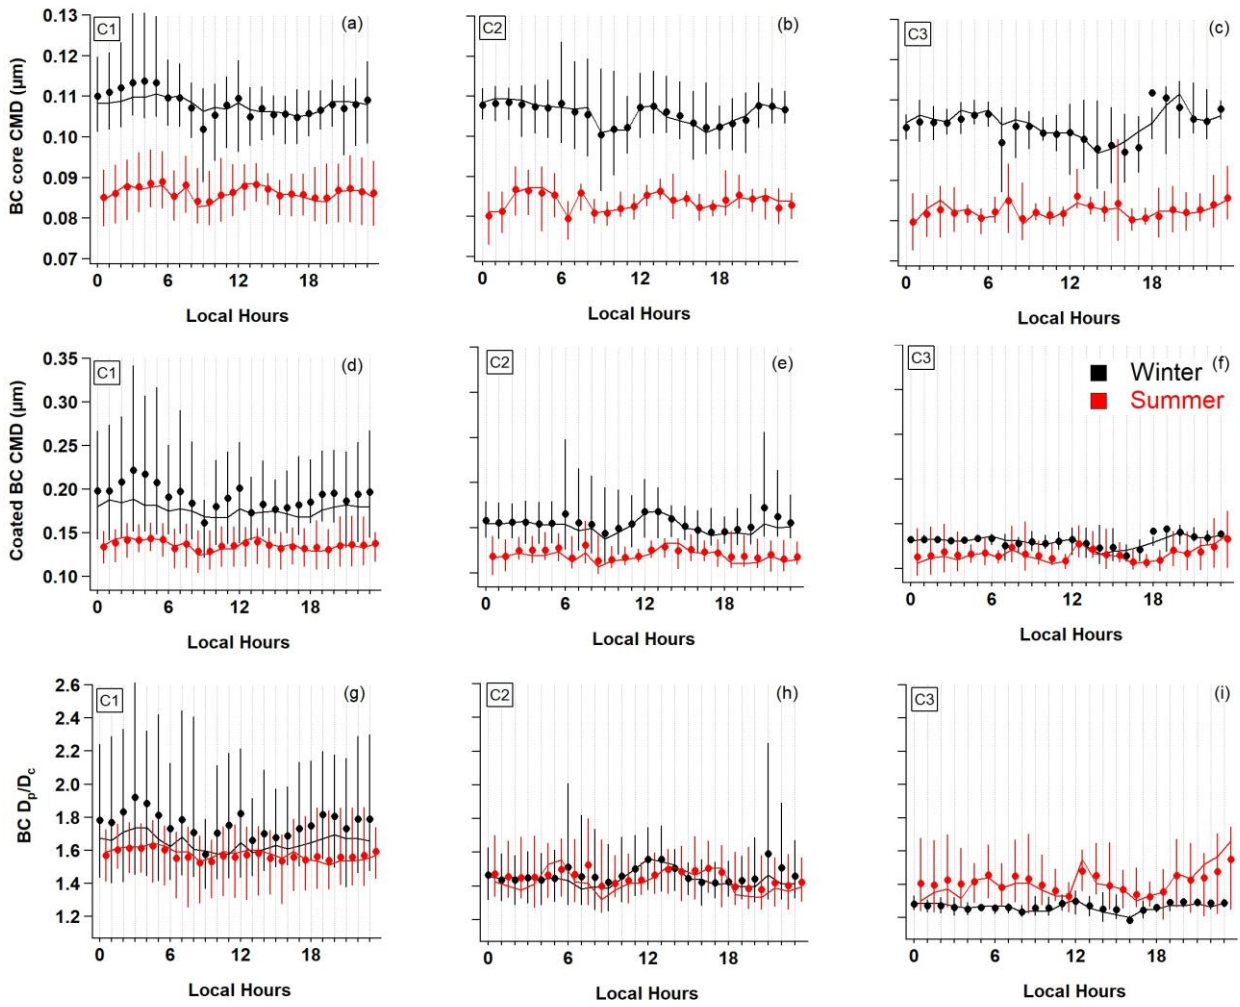

Fig. S3. Diurnal variations of BC core CMD (a-c), BC coated CMD (d-f) and BC  $D_p/D_c$  (g-i) for the three PBL types in both seasons. The solid circles, lines and whiskers denote the mean, median, 25<sup>th</sup>, 75<sup>th</sup> percentile respectively.

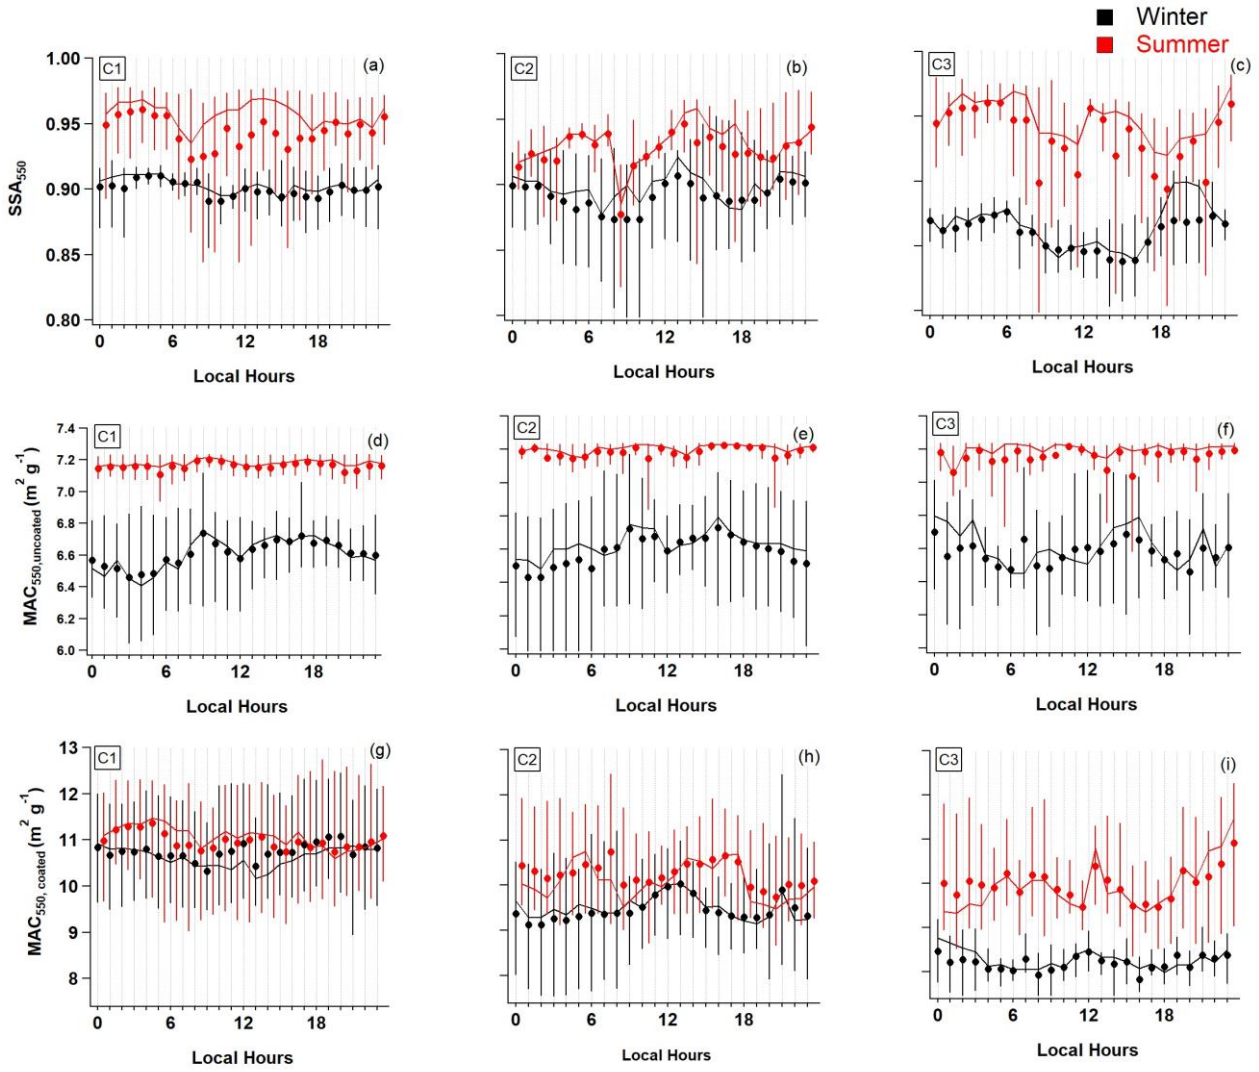

Fig. S4. Diurnal variation of SSA<sub>550</sub> (a-c), MAC<sub>550,uncoated</sub> (d-f) and MAC<sub>550,coated</sub> (g-i) for the three PBL types in both seasons. The solid circles, lines and whiskers denote the mean, median, 25<sup>th</sup>, 75<sup>th</sup> percentile respectively.

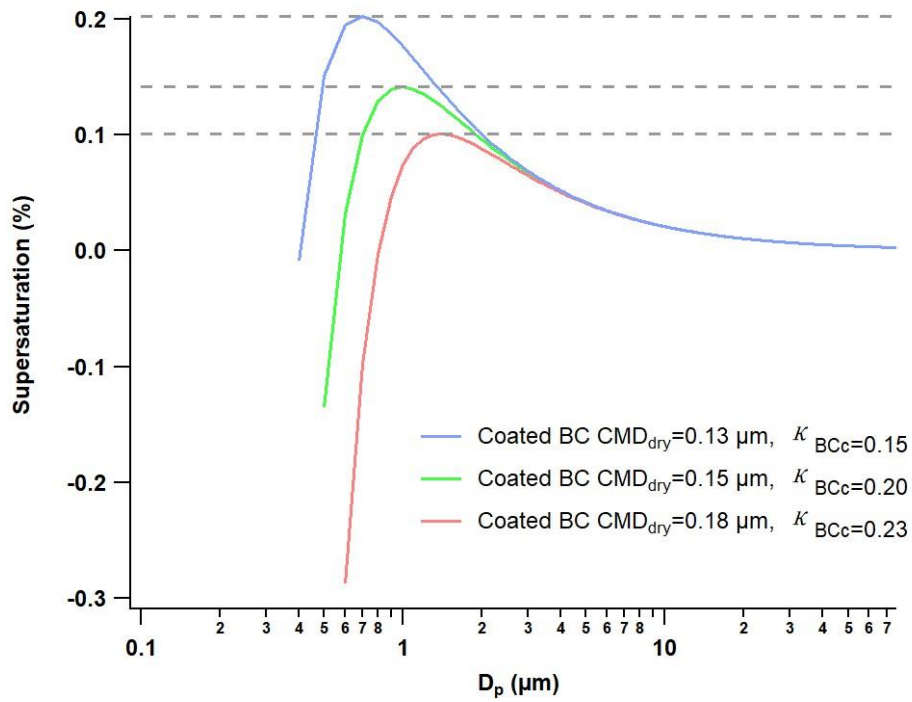

Fig. S5. Examples of critical supersaturation calculation for the three typical BC containing particles, using the coated BC CMD and corresponding  $\kappa_{\text{BCc}}$  as inputs. The dashed line denotes the critical supersaturation to activate the BC with given CMD and  $\kappa_{\text{BCc}}$ .
